# Supplementary material for: A scoring test on probabilistic seismic hazard estimates in Italy
Source: Copernicus journal article supplement (doi:10.5194/nhess-15-171-2015), 2015-01-29
Supplement: Supplementary file 1 [file nhess-15-171-2015-supplement.zip]

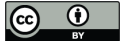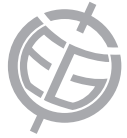

## *Supplement of*

# **A scoring test on probabilistic seismic hazard estimates in Italy**

**D. Albarello et al.**

*Correspondence to:* L. Peruzza ([lperuzza@inogs.it](mailto:lperuzza@inogs.it))

- nhess-15-171-2015-supplement-cover-letter.pdf
- \_\_MACOSX
  - .\_nhess-2014-184-supplement\_f
  - nhess-2014-184-supplement\_f
    - \* .\_DS\_Store
    - \* .\_NHESS\_SupplA\_Albareлло\_etal\_2015.xlsx
    - \* .\_NHESS\_SupplB\_Albareлло\_etal\_2015.doc
- nhess-2014-184-supplement\_f
  - .DS\_Store
  - NHESS\_SupplA\_Albareлло\_etal\_2015.xlsx
  - NHESS\_SupplB\_Albareлло\_etal\_2015.doc
